# Supplementary material for: Effects of Sn doping content on the structure, morphology, optical and electrical properties of ITO thin films prepared by microwave-assisted spray pyrolysis
Source: Royal Society of Chemistry journal article supplement (doi:10.1039/d5ra09041e), 2026-01-01
Supplement: d5ra09041e1.pdf [file d5ra09041e1.pdf]

## Supplemental Material

### Effects of doped Sn content on the structure, morphology, optical and electrical properties of indium tin oxide thin films by microwave-assisted spray pyrolysis

Yulun Feng<sup>b,c</sup>, Leyuan Zhang<sup>b,c</sup>, Haoran Chen<sup>b,c</sup>, Lihua Zhang<sup>a,b,c,\*</sup>, Xin Guo<sup>b,c</sup>,

Xinya Liu<sup>b,c</sup>, Shenghui Guo<sup>a,b,c,\*</sup>

<sup>a</sup> State Key Laboratory of Complex Nonferrous Metal Resources Clean Utilization, Kunming 650093, China.

<sup>b</sup> Key Laboratory of Unconventional Metallurgy, Ministry of Education, Kunming 650093, China.

<sup>c</sup> Faculty of Metallurgical and Energy Engineering, Kunming University of Science and Technology, Kunming 650093, China.

\*Corresponding author 1: Lihua Zhang, E-mail: zhanglihua@kust.edu.cn

\*Corresponding author 2: Shenghui Guo, E-mail: 20040051@kust.edu.cn

To verify the repeatability of the experimental results, two identical samples were conducted under the same deposition parameters. All the experimental data presented in this manuscript represent the average values of the two replicate tests.

The relative standard deviation (RSD) is a statistical relative indicator used to quantify the degree of data dispersion. This parameter reflects the extent to which individual data points deviate from the mean value, where a higher RSD value indicates a greater level of dispersion. It is calculated by the following formula:

$$RSD = \frac{\sqrt{\frac{\sum_{i=1}^n (X_i - \bar{X})^2}{n-1}}}{\bar{X}} \times 100\% \quad (S-1)$$

Where  $\bar{X}$  is the mean value of the measured samples,  $X_i$  is the individual measured value each sample, and n is the number of test replicates.

The RSD results from the ITO thin films with varying SnO<sub>2</sub> doping levels are shown in the Table S1.

Table S1 shows that the RSD values of surface roughness, film thickness and electrical resistivity are all within 15%, demonstrating good batch-to-batch repeatability of the prepared films fabricated under identical deposition conditions. The minor performance fluctuations (with  $RSD \leq 15\%$ ) can be attributed to slight inhomogeneities of the quartz substrates, which is a common occurrence in the s deposition processes using spray pyrolysis.

Table S1 Relative standard deviation (RSD) of surface roughness, film thickness and electrical resistivity for ITO films with different SnO<sub>2</sub> doping concentrations

| Samples with different SnO <sub>2</sub> content (wt%) |                                    | 0      | 5      | 10     | 15     | 20     |
|-------------------------------------------------------|------------------------------------|--------|--------|--------|--------|--------|
| Roughness                                             | Average (nm)                       | 22.9   | 17.1   | 5.27   | 9.78   | 12.1   |
|                                                       | Deviation (nm)                     | ± 1.8  | ± 1.6  | ± 0.45 | ± 0.93 | ± 1.05 |
|                                                       | RSD (%)                            | 11.1   | 13.2   | 12.1   | 13.4   | 12.3   |
| Thickness                                             | Average (nm)                       | 590.8  | 486.95 | 404.7  | 310.3  | 295.65 |
|                                                       | Deviation (nm)                     | ± 40   | ± 35   | ± 30   | ± 27   | ± 25   |
|                                                       | RSD (%)                            | 9.6    | 10.2   | 10.5   | 12.3   | 12.0   |
| Resistivity                                           | Average (×10 <sup>-4</sup> Ω·cm)   | 170.62 | 5.66   | 2.97   | 8.29   | 9.43   |
|                                                       | Deviation (×10 <sup>-4</sup> Ω·cm) | ± 4.3  | ± 0.46 | ± 0.29 | ± 0.65 | ± 0.65 |
|                                                       | RSD (%)                            | 3.6    | 11.5   | 13.8   | 11.1   | 9.7    |
